# Supplementary material
Source: PubMed Central journal article supplement (PMC6741626)
Supplement: jin-0006-0467-s01.pdf [file jin-0006-0467-s01.pdf]

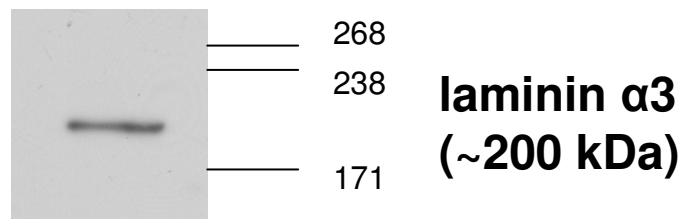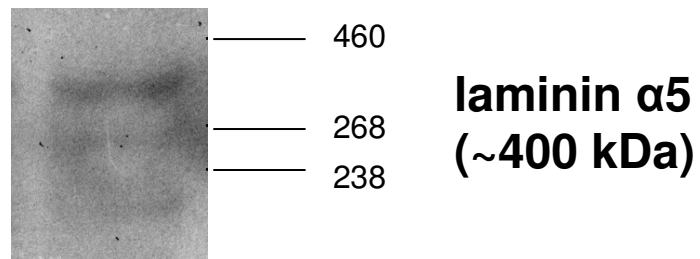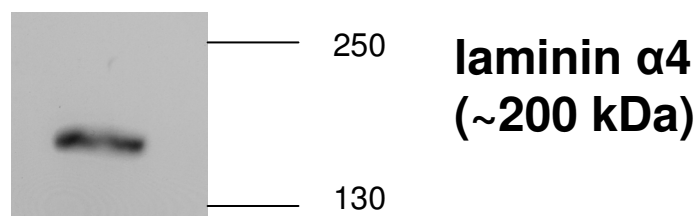

Supplementary Figure S1

**Expression of laminin  $\alpha$ 3 and  $\alpha$ 5 in HaCaT keratinocytes and laminin  $\alpha$ 4 in primary fibroblasts**

20-30  $\mu$ g of each cell lysate was applied for Western blot analysis using antibodies to probe laminin  $\alpha$ 3 and  $\alpha$ 5 in keratinocytes and laminin  $\alpha$ 4 in fibroblasts.

E N D F M T L F L A H

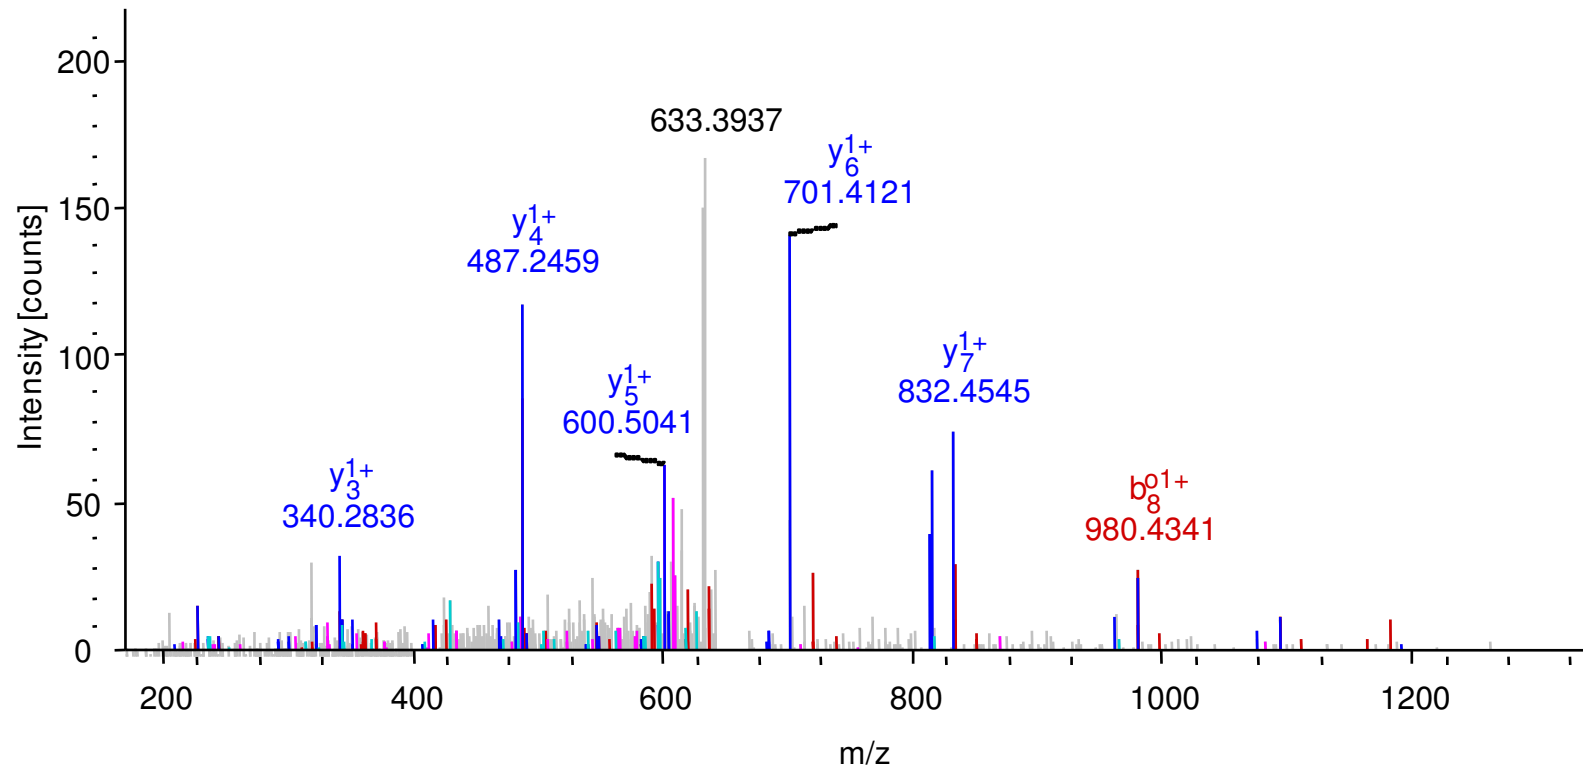

Supplementary Figure S2

### Identification of secreted biologically active peptide from LG4 module of laminin $\alpha 4$

The LC-MS/MS spectrum shows isotope peaks of the identified native peptide without tryptic digest (ENDFMTLFLAH (4-END11)) from supernatant of primary fibroblasts purified by heparin-affinity chromatography and further fraction screening.

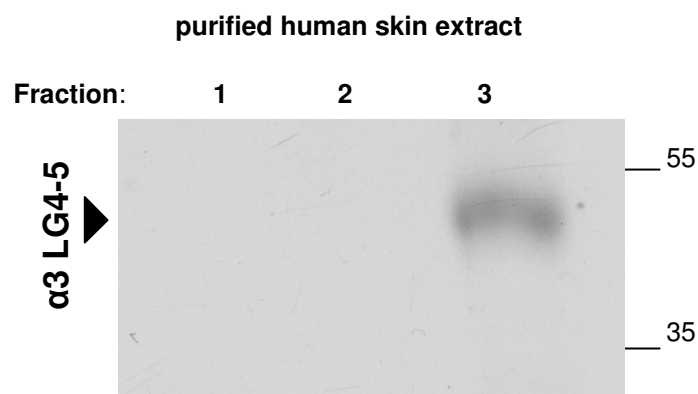

Supplementary Figure S3

**Presence of processed laminin  $\alpha 3$  LG4-5 in healthy human skin**

Eluted fractions (1-3) of healthy human skin extracts after heparin-affinity chromatography were collected and concentrated. 5  $\mu$ g protein of each fraction (1-3) were applied for Western blot analysis using polyclonal antibody against the laminin  $\alpha 3$  LG4-5 module. Identification of secreted biologically active peptide from LG4 module of laminin  $\alpha 4$ .

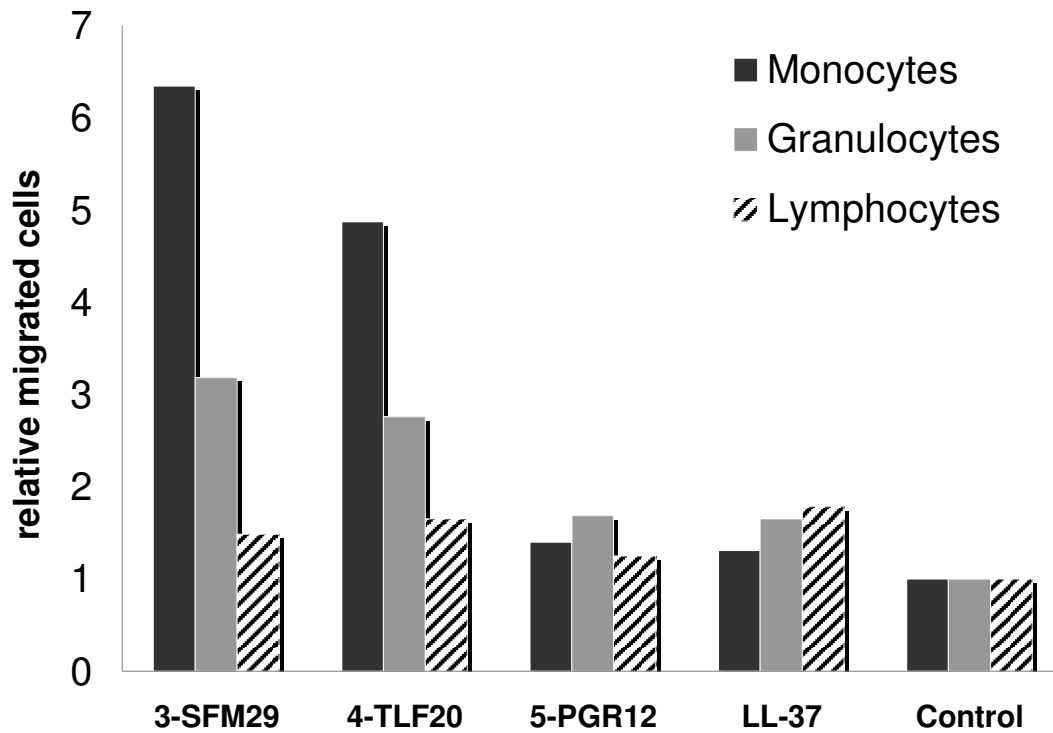

Supplementary Figure S4

### Analysis of leukocyte subpopulations for chemotactic activity

Leukocytes subpopulations were identified by FACS analysis. Monocytes (dark bar), granulocytes (grey bar), and lymphocytes (striped bar) were gated according to FSC/SSC. Indicated subpopulations were assessed for chemotactic response to laminin LG4 peptides (each 10  $\mu\text{g}/\text{ml}$ ), LL-37 (1  $\mu\text{g}/\text{ml}$ ) relative to control (solvent; ddH<sub>2</sub>O) by using a modified Boyden chamber assay (Transwell, 3.0  $\mu\text{m}$  pore size; Nunc).
